# Supplementary material for: Thermal Stability and Vibrational Properties of the 6,6,12-Graphyne-Based Isolated Molecules and Two-Dimensional Crystal
Source: MDPI journal article supplement (doi:10.3390/ma16051964), 2023-02-27
Supplement: s1 [file s1]

## Supplementary Materials

for

# Thermal Stability and Vibrational Properties of the 6,6,12-Graphyne-Based Isolated Molecules and Two-Dimensional Crystal

Ekaterina S. Dolina <sup>1</sup>, Pavel A. Kulyamin <sup>1</sup>, Anastasiya A. Grekova <sup>1</sup>, Alexey I. Kochaev <sup>2,3,4</sup>, Mikhail M. Maslov <sup>1,2</sup> and Konstantin P. Katin <sup>1,2,\*</sup>

<sup>1</sup> Institute of Nanotechnologies in Electronics, Spintronics and Photonics, National Research Nuclear University “MEPhI”, Kashirskoe Sh. 31, Moscow 115409, Russia

<sup>2</sup> Laboratory of Computational Design of Nanostructures, Nanodevices, and Nanotechnologies, Research Institute for the Development of Scientific and Educational Potential of Youth, Aviatorov Str. 14/55, Moscow 119620, Russia

<sup>3</sup> Laboratory of Acoustic Microscopy, Science Institute of Biochemical Physics Named after N.M. Emanuel of the Russian Academy of Sciences, Kosygina Str. 4, Moscow 119334, Russia

<sup>4</sup> Research and Education Center “Silicon and Carbon Nanotechnologies”, Ulyanovsk State University, Leo Tolstoy Str. 42, Ulyanovsk 432017, Russia

\* Correspondence: kpkatin@yandex.ru

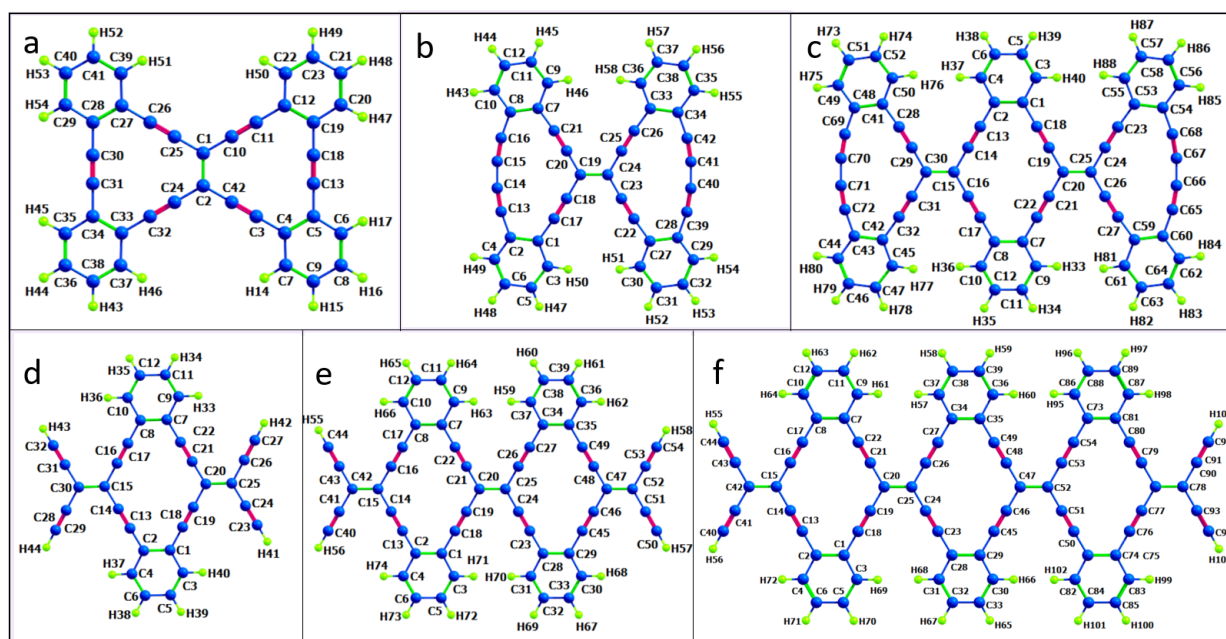

**Figure S1.** Valence angles of 6,6,12-graphyne-based oligomers: (a)  $\underline{O1}$ : C(25)-C(1)-C(10)  $120.035^\circ$ ; C(26)-C(25)-C(1)  $179.678^\circ$ ; C(27)-C(26)-C(25)  $179.908^\circ$ ; C(40)-C(41)-C(39)  $120.063^\circ$ ; (b)  $\underline{O2}$ : C(20)-C(19)-C(18)  $119.962^\circ$ ; C(19)-C(20)-C(21)  $178.005^\circ$ ; C(20)-C(21)-C(7)  $176.107^\circ$ ; C(12)-C(11)-C(9)  $120.205^\circ$ ; C(8)-C(16)-C(15)  $169.777^\circ$ ; C(16)-C(15)-C(14)  $170.590^\circ$ ;

C(15)-C(14)-C(13) **170.568°**; C(14)-C(13)-C(2) **169.699°**; (c) O3: C(29)-C(30)-C(31) **119.918°**; C(30)-C(29)-C(28) **178.000°**; C(41)-C(28)-C(29) **176.197°**; C(16)-C(15)-C(14) **120.153°**; C(15)-C(14)-C(13) **179.769°**; C(14)-C(13)-C(2) **179.941°**; C(6)-C(5)-C(3) **120.043°**; C(48)-C(69)-C(70) **169.744°**; C(69)-C(70)-C(71) **170.508°**; C(70)-C(71)-C(72) **170.513°**; C(71)-C(72)-C(43) **169.762°**; (d) O4: C(26)-C(25)-C(24) **120.058°** [116.02°]; C(21)-C(20)-C(19) **120.183°** [117.45°]; C(20)-C(21)-C(22) **179.808°** [174.6°]; C(21)-C(22)-C(7) **179.892°** [177.8°]; C(20)-C(19)-C(18) **179.927°** [178.6°]; C(19)-C(18)-C(1) **179.769°** [176.56°]; C(12)-C(11)-C(9) **120.069°**; (e) O5: C(53)-C(52)-C(51) **120.050°** [115.74°]; C(25)-C(26)-C(27) **179.569°** [179.30°]; C(26)-C(27)-C(34) **179.878°** [175.8°]; C(25)-C(24)-C(23) **179.530°** [176.52°]; C(24)-C(23)-C(28) **179.917°** [177.9°]; C(26)-C(25)-C(24) **119.969°** [117.91°]; C(47)-C(48)-C(49) **179.683°** [171.3°]; C(48)-C(49)-C(35) **179.782°** [177.5°]; C(47)-C(46)-C(45) **179.723°** [178.8°]; C(46)-C(45)-C(29) **179.743°** [174.2°]; C(48)-C(47)-C(46) **119.737°** [117.59°] C(12)-C(11)-C(9) **120.054°**; (f) O6: C(91)-C(90)-C(93) **120.032°**; C(90)-C(91)-C(92) **179.879°**; C(77)-C(78)-C(79) **119.738°**; C(78)-C(79)-C(80) **179.720°**; C(79)-C(80)-C(81) **179.778°**; C(88)-C(89)-C(87) **119.980°**. The values in square brackets correspond to the experimentally obtained data (see Ref. 22).

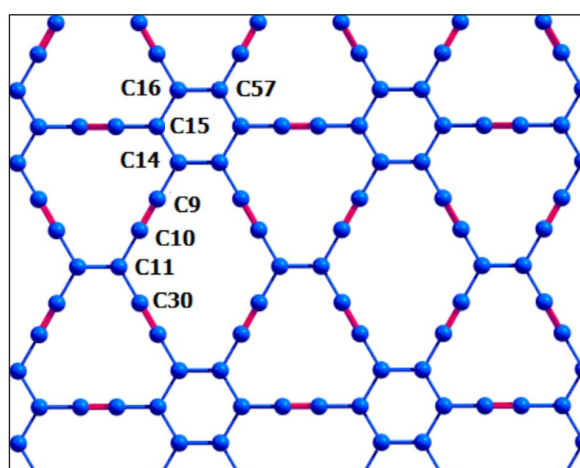

**Figure S2.** Valence angles of 6,6,12-graphyne crystal: C(30)-C(11)-C(10) **120.384°**; C(11)-C(10)-C(9) **179.952°**; C(10)-C(9)-C(14) **179.578°**; C(15)-C(16)-C(57) **120.315°**.
